# Supplementary material
Source: ML conference proceedings conference paper supplement (https://aclanthology.org/D16-1246)
Supplement: Attachment [file D16-1246.Attachment.zip]

Archive with 76 entries (47 files):
- emnlp-cam/
- emnlp-cam/.DS_Store
- __MACOSX/
- __MACOSX/emnlp-cam/
- __MACOSX/emnlp-cam/._.DS_Store
- emnlp-cam/.git/
- emnlp-cam/.git/COMMIT_EDITMSG
- emnlp-cam/.git/config
- emnlp-cam/.git/description
- emnlp-cam/.git/HEAD
- emnlp-cam/.git/hooks/
- emnlp-cam/.git/hooks/applypatch-msg.sample
- emnlp-cam/.git/hooks/commit-msg.sample
- emnlp-cam/.git/hooks/post-update.sample
- emnlp-cam/.git/hooks/pre-applypatch.sample
- emnlp-cam/.git/hooks/pre-commit.sample
- emnlp-cam/.git/hooks/pre-push.sample
- emnlp-cam/.git/hooks/pre-rebase.sample
- emnlp-cam/.git/hooks/prepare-commit-msg.sample
- emnlp-cam/.git/hooks/update.sample
- emnlp-cam/.git/index
- emnlp-cam/.git/info/
- emnlp-cam/.git/info/exclude
- emnlp-cam/.git/logs/
- emnlp-cam/.git/logs/HEAD
- emnlp-cam/.git/logs/refs/
- emnlp-cam/.git/logs/refs/heads/
- emnlp-cam/.git/logs/refs/heads/master
- emnlp-cam/.git/objects/
- emnlp-cam/.git/objects/07/
- emnlp-cam/.git/objects/07/f2c50ae778411bb184e3e1ba9de4cbecb69ebb
- emnlp-cam/.git/objects/08/
- emnlp-cam/.git/objects/08/9c71ab8d69276a6c4fff0437039bb160052bd5
- emnlp-cam/.git/objects/0f/
- emnlp-cam/.git/objects/0f/a52ea8a5de5de586d261e9e9f397836034e47b
- emnlp-cam/.git/objects/1d/
- emnlp-cam/.git/objects/1d/f7fefa306d66a948140e9f749175a8307017dc
- emnlp-cam/.git/objects/44/
- emnlp-cam/.git/objects/44/b48facf706aed3c7c3cfeb1c59bd717dbc2892
- emnlp-cam/.git/objects/47/
- emnlp-cam/.git/objects/47/ee868ee65353dc75d3eb3ccc36538cabd546f7
- emnlp-cam/.git/objects/78/
- emnlp-cam/.git/objects/78/de5aefdd6d8c8d64d0a66e54f1ab5c33e6e5f7
- emnlp-cam/.git/objects/9f/
- emnlp-cam/.git/objects/9f/987f612b80bfee4e33e21bc147818138dcb345
- emnlp-cam/.git/objects/ac/
- emnlp-cam/.git/objects/ac/f9404a6b32bd9c49d40a87a7396a7b71278a7d
- emnlp-cam/.git/objects/ad/
- emnlp-cam/.git/objects/ad/b0f0e5d9307c4cc08c116375d6b066d930084d
- emnlp-cam/.git/objects/ae/
- emnlp-cam/.git/objects/ae/7737f582338cad17275e2d84ad88bd6c76ffdf
- emnlp-cam/.git/objects/b9/
- emnlp-cam/.git/objects/b9/5ec040dfc4ed9589c5ade3e52acad33d2744a4
- emnlp-cam/.git/objects/f0/
- emnlp-cam/.git/objects/f0/9385a914c161f770c8ae7d690a651911e6ad78
- emnlp-cam/.git/objects/f1/
- emnlp-cam/.git/objects/f1/4fcfdfa4a6e5cb2f4f6ae6070c20989957b85b
- emnlp-cam/.git/objects/info/
- emnlp-cam/.git/objects/pack/
- emnlp-cam/.git/refs/
- emnlp-cam/.git/refs/heads/
- emnlp-cam/.git/refs/heads/master
- emnlp-cam/.git/refs/tags/
- emnlp-cam/cgnn.pdf
- __MACOSX/emnlp-cam/._cgnn.pdf
- emnlp-cam/emnlp2016.aux
- emnlp-cam/emnlp2016.bbl
- emnlp-cam/emnlp2016.bib
- emnlp-cam/emnlp2016.blg
- emnlp-cam/emnlp2016.bst
- emnlp-cam/emnlp2016.log
- emnlp-cam/emnlp2016.pdf
- __MACOSX/emnlp-cam/._emnlp2016.pdf
- emnlp-cam/emnlp2016.sty
- emnlp-cam/emnlp2016.synctex.gz
- emnlp-cam/emnlp2016.tex
