# Supplementary material
Source: ML conference proceedings conference paper supplement (https://aclanthology.org/D16-1246)
Supplement: Attachment [file D16-1246.Attachment.zip › emnlp-cam/emnlp2016.aux]

\relax 
\citation{liakata2013discourse,jansen2014discourse}
\citation{meyer2012using,meyer2013machine}
\citation{murray2006incorporating,yoshida2014dependency}
\citation{K15-2001,K16-2000}
\citation{K16-2010,K16-2008,K15-2005,K16-2004}
\citation{K16-2010,pitler-louis-nenkova:2009:ACLIJCNLP,lin2014pdtb}
\citation{pitler-louis-nenkova:2009:ACLIJCNLP,zhou2010predicting,park2012improving,mckeown2013aggregated,rutherford-xue:2014:EACL,braud2015comparing}
\citation{zhou2010predicting,rutherford-xue:2014:EACL}
\citation{wang2016converting,zhang2016learning,jia2014joint}
\citation{coling,wang2016learning,zhang2016probabilistic,wang2015word,wang2014neural,P16-1039}
\citation{TACL536}
\citation{zhang-EtAl:2015:EMNLP4}
\@writefile{toc}{\contentsline {section}{\numberline {1}Introduction}{1}}
\newlabel{key}{{1}{1}}
\citation{kalchbrenner-grefenstette-blunsom:2014:P14-1,kim:2014:EMNLP2014}
\citation{srivastava2015highway}
\citation{pitler-louis-nenkova:2009:ACLIJCNLP}
\@writefile{toc}{\contentsline {section}{\numberline {2}Method}{2}}
\@writefile{toc}{\contentsline {subsection}{\numberline {2.1}Convolutional Neural Network}{2}}
\@writefile{lof}{\contentsline {figure}{\numberline {1}{\ignorespaces Model Architecture}}{2}}
\newlabel{fig:2gate}{{1}{2}}
\citation{hochreiter1997long}
\citation{chung2014empirical}
\citation{srivastava2015highway}
\citation{srivastava2015highway}
\@writefile{lot}{\contentsline {table}{\numberline {1}{\ignorespaces  $F_1$ scores (\%) with different models. }}{3}}
\newlabel{layer}{{1}{3}}
\@writefile{toc}{\contentsline {subsection}{\numberline {2.2}Collaborative Gated Neural Network}{3}}
\@writefile{toc}{\contentsline {subsection}{\numberline {2.3}Output and Training}{3}}
\citation{duchi2011adaptive}
\citation{pitler-louis-nenkova:2009:ACLIJCNLP}
\citation{zhou2010predicting}
\citation{park2012improving}
\citation{mckeown2013aggregated}
\citation{TACL536}
\citation{braud2015comparing}
\citation{P16-1163}
\citation{rutherford-xue:2014:EACL}
\citation{zhang-EtAl:2015:EMNLP4}
\citation{rutherford-xue:2014:EACL}
\citation{zhang-EtAl:2015:EMNLP4}
\citation{rutherford-xue:2014:EACL}
\citation{zhang-EtAl:2015:EMNLP4}
\citation{rutherford-xue:2014:EACL}
\citation{zhang-EtAl:2015:EMNLP4}
\citation{rutherford-xue:2014:EACL}
\citation{zhang-EtAl:2015:EMNLP4}
\citation{prasad2008penn}
\citation{pitler-louis-nenkova:2009:ACLIJCNLP}
\citation{mikolov2013distributed}
\citation{pitler-louis-nenkova:2009:ACLIJCNLP}
\citation{zhou2010predicting}
\citation{park2012improving}
\citation{mckeown2013aggregated}
\citation{rutherford-xue:2014:EACL}
\citation{zhang-EtAl:2015:EMNLP4}
\citation{TACL536}
\citation{braud2015comparing}
\citation{P16-1163}
\@writefile{toc}{\contentsline {section}{\numberline {3}Experiments}{4}}
\@writefile{toc}{\contentsline {subsection}{\numberline {3.1}Setting}{4}}
\@writefile{toc}{\contentsline {subsection}{\numberline {3.2}Model Analysis}{4}}
\@writefile{toc}{\contentsline {subsection}{\numberline {3.3}Results}{4}}
\bibdata{emnlp2016}
\bibcite{mckeown2013aggregated}{\citename {Biran and McKeown}2013}
\@writefile{lot}{\contentsline {table}{\numberline {2}{\ignorespaces  Comparisons of $F_1$ scores (\%) (symbol \textbf  {+} means \textit  {\textsc  {Exp.}} with \textit  {Entrel}). }}{5}}
\newlabel{resulta}{{2}{5}}
\@writefile{lot}{\contentsline {table}{\numberline {3}{\ignorespaces  Comparisons of $F_1$ scores (\%) (\textit  {\textsc  {Exp.}} without \textit  {Entrel}).}}{5}}
\newlabel{resultb}{{3}{5}}
\@writefile{toc}{\contentsline {section}{\numberline {4}Conclusion}{5}}
\bibcite{braud2015comparing}{\citename {Braud and Denis}2015}
\bibcite{P16-1039}{\citename {Cai and Zhao}2016}
\bibcite{K15-2005}{\citename {Chen \bgroup et al.\egroup }2015}
\bibcite{P16-1163}{\citename {Chen \bgroup et al.\egroup }2016}
\bibcite{chung2014empirical}{\citename {Chung \bgroup et al.\egroup }2014}
\bibcite{duchi2011adaptive}{\citename {Duchi \bgroup et al.\egroup }2011}
\bibcite{hochreiter1997long}{\citename {Hochreiter and Schmidhuber}1997}
\bibcite{jansen2014discourse}{\citename {Jansen \bgroup et al.\egroup }2014}
\bibcite{TACL536}{\citename {Ji and Eisenstein}2015}
\bibcite{jia2014joint}{\citename {Jia and Zhao}2014}
\bibcite{kalchbrenner-grefenstette-blunsom:2014:P14-1}{\citename {Kalchbrenner \bgroup et al.\egroup }2014}
\bibcite{kim:2014:EMNLP2014}{\citename {Kim}2014}
\bibcite{K16-2008}{\citename {Li \bgroup et al.\egroup }2016}
\bibcite{liakata2013discourse}{\citename {Liakata \bgroup et al.\egroup }2013}
\bibcite{lin2014pdtb}{\citename {Lin \bgroup et al.\egroup }2014}
\bibcite{meyer2012using}{\citename {Meyer and Popescu-Belis}2012}
\bibcite{meyer2013machine}{\citename {Meyer and Webber}2013}
\bibcite{mikolov2013distributed}{\citename {Mikolov \bgroup et al.\egroup }2013}
\bibcite{murray2006incorporating}{\citename {Murray \bgroup et al.\egroup }2006}
\bibcite{park2012improving}{\citename {Park and Cardie}2012}
\bibcite{pitler-louis-nenkova:2009:ACLIJCNLP}{\citename {Pitler \bgroup et al.\egroup }2009}
\bibcite{prasad2008penn}{\citename {Prasad \bgroup et al.\egroup }2008}
\bibcite{coling}{\citename {Qin \bgroup et al.\egroup }2016a}
\bibcite{K16-2010}{\citename {Qin \bgroup et al.\egroup }2016b}
\bibcite{rutherford-xue:2014:EACL}{\citename {Rutherford and Xue}2014}
\bibcite{srivastava2015highway}{\citename {Srivastava \bgroup et al.\egroup }2015}
\bibcite{K16-2004}{\citename {Wang and Lan}2016}
\bibcite{wang2014neural}{\citename {Wang \bgroup et al.\egroup }2014}
\bibcite{wang2015word}{\citename {Wang \bgroup et al.\egroup }2015}
\bibcite{wang2016learning}{\citename {Wang \bgroup et al.\egroup }2016a}
\bibcite{wang2016converting}{\citename {Wang \bgroup et al.\egroup }2016b}
\bibcite{K15-2001}{\citename {Xue \bgroup et al.\egroup }2015}
\bibcite{K16-2000}{\citename {Xue \bgroup et al.\egroup }2016}
\bibcite{yoshida2014dependency}{\citename {Yoshida \bgroup et al.\egroup }2014}
\bibcite{zhang-EtAl:2015:EMNLP4}{\citename {Zhang \bgroup et al.\egroup }2015}
\bibcite{zhang2016learning}{\citename {Zhang \bgroup et al.\egroup }2016a}
\bibcite{zhang2016probabilistic}{\citename {Zhang \bgroup et al.\egroup }2016b}
\bibcite{zhou2010predicting}{\citename {Zhou \bgroup et al.\egroup }2010}
\bibstyle{emnlp2016}
