# Supplementary material
Source: ML conference proceedings conference paper supplement (https://aclanthology.org/D16-1246)
Supplement: Attachment [file D16-1246.Attachment.zip › emnlp-cam/emnlp2016.bbl]

\begin{thebibliography}{}

\bibitem[\protect\citename{Biran and McKeown}2013]{mckeown2013aggregated}
Or~Biran and Kathleen McKeown.
\newblock 2013.
\newblock Aggregated word pair features for implicit discourse relation
  disambiguation.
\newblock In {\em Proceedings of the 51st Annual Meeting of the Association for
  Computational Linguistics (ACL)}, pages 69--73, Sofia, Bulgaria, August.

\bibitem[\protect\citename{Braud and Denis}2015]{braud2015comparing}
Chlo\'{e} Braud and Pascal Denis.
\newblock 2015.
\newblock Comparing word representations for implicit discourse relation
  classification.
\newblock In {\em Proceedings of the 2015 Conference on Empirical Methods in
  Natural Language Processing (EMNLP)}, pages 2201--2211, Lisbon, Portugal,
  September.

\bibitem[\protect\citename{Cai and Zhao}2016]{P16-1039}
Deng Cai and Hai Zhao.
\newblock 2016.
\newblock {Neural Word Segmentation Learning for Chinese}.
\newblock In {\em Proceedings of the 54th Annual Meeting of the Association for
  Computational Linguistics (ACL)}, pages 409--420, Berlin, Germany, August.

\bibitem[\protect\citename{Chen \bgroup et al.\egroup }2015]{K15-2005}
Changge Chen, Peilu Wang, and Hai Zhao.
\newblock 2015.
\newblock Shallow discourse parsing using constituent parsing tree.
\newblock In {\em Proceedings of the CoNLL-15 shared task}, pages 37--41,
  Beijing, China, July.

\bibitem[\protect\citename{Chen \bgroup et al.\egroup }2016]{P16-1163}
Jifan Chen, Qi~Zhang, Pengfei Liu, Xipeng Qiu, and Xuanjing Huang.
\newblock 2016.
\newblock Implicit discourse relation detection via a deep architecture with
  gated relevance network.
\newblock In {\em Proceedings of the 54th Annual Meeting of the Association for
  Computational Linguistics (ACL)}, pages 1726--1735, Berlin, Germany, August.

\bibitem[\protect\citename{Chung \bgroup et al.\egroup
  }2014]{chung2014empirical}
Junyoung Chung, Caglar Gulcehre, KyungHyun Cho, and Yoshua Bengio.
\newblock 2014.
\newblock Empirical evaluation of gated recurrent neural networks on sequence
  modeling.
\newblock {\em arXiv preprint arXiv:1412.3555}.

\bibitem[\protect\citename{Duchi \bgroup et al.\egroup
  }2011]{duchi2011adaptive}
John Duchi, Elad Hazan, and Yoram Singer.
\newblock 2011.
\newblock Adaptive subgradient methods for online learning and stochastic
  optimization.
\newblock {\em The Journal of Machine Learning Research}, 12:2121--2159.

\bibitem[\protect\citename{Hochreiter and Schmidhuber}1997]{hochreiter1997long}
Sepp Hochreiter and J{\"u}rgen Schmidhuber.
\newblock 1997.
\newblock {Long Short-Term Memory}.
\newblock {\em Neural computation}, 9(8):1735--1780.

\bibitem[\protect\citename{Jansen \bgroup et al.\egroup
  }2014]{jansen2014discourse}
Peter Jansen, Mihai Surdeanu, and Peter Clark.
\newblock 2014.
\newblock Discourse complements lexical semantics for non-factoid answer
  reranking.
\newblock In {\em Proceedings of the 52nd Annual Meeting of the Association for
  Computational Linguistics (ACL)}, pages 977--986, Baltimore, Maryland, June.

\bibitem[\protect\citename{Ji and Eisenstein}2015]{TACL536}
Yangfeng Ji and Jacob Eisenstein.
\newblock 2015.
\newblock One vector is not enough: Entity-augmented distributed semantics for
  discourse relations.
\newblock {\em Transactions of the Association for Computational Linguistics
  (TACL)}, 3:329--344.

\bibitem[\protect\citename{Jia and Zhao}2014]{jia2014joint}
Zhongye Jia and Hai Zhao.
\newblock 2014.
\newblock {A Joint Graph Model for Pinyin-to-Chinese Conversion with Typo
  Correction}.
\newblock In {\em Proceedings of the 52nd Annual Meeting of the Association for
  Computational Linguistics (ACL)}, pages 1512--1523, Baltimore, Maryland,
  June.

\bibitem[\protect\citename{Kalchbrenner \bgroup et al.\egroup
  }2014]{kalchbrenner-grefenstette-blunsom:2014:P14-1}
Nal Kalchbrenner, Edward Grefenstette, and Phil Blunsom.
\newblock 2014.
\newblock A convolutional neural network for modelling sentences.
\newblock In {\em Proceedings of the 52nd Annual Meeting of the Association for
  Computational Linguistics (ACL)}, pages 655--665, Baltimore, Maryland, June.

\bibitem[\protect\citename{Kim}2014]{kim:2014:EMNLP2014}
Yoon Kim.
\newblock 2014.
\newblock Convolutional neural networks for sentence classification.
\newblock In {\em Proceedings of the 2014 Conference on Empirical Methods in
  Natural Language Processing (EMNLP)}, pages 1746--1751, Doha, Qatar, October.

\bibitem[\protect\citename{Li \bgroup et al.\egroup }2016]{K16-2008}
Zhongyi Li, Hai Zhao, Chenxi Pang, Lili Wang, and Huan Wang.
\newblock 2016.
\newblock A constituent syntactic parse tree based discourse parser.
\newblock In {\em Proceedings of the CoNLL-16 shared task}, pages 60--64,
  Berlin, Germany, August.

\bibitem[\protect\citename{Liakata \bgroup et al.\egroup
  }2013]{liakata2013discourse}
Maria Liakata, Simon Dobnik, Shyamasree Saha, Colin Batchelor, and Dietrich
  Rebholz-Schuhmann.
\newblock 2013.
\newblock A discourse-driven content model for summarising scientific articles
  evaluated in a complex question answering task.
\newblock In {\em Proceedings of the 2013 Conference on Empirical Methods in
  Natural Language Processing (EMNLP)}, pages 747--757, Seattle, Washington,
  USA, October.

\bibitem[\protect\citename{Lin \bgroup et al.\egroup }2014]{lin2014pdtb}
Ziheng Lin, Hwee~Tou Ng, and Min-Yen Kan.
\newblock 2014.
\newblock A pdtb-styled end-to-end discourse parser.
\newblock {\em Natural Language Engineering}, 20(02):151--184.

\bibitem[\protect\citename{Meyer and Popescu-Belis}2012]{meyer2012using}
Thomas Meyer and Andrei Popescu-Belis.
\newblock 2012.
\newblock Using sense-labeled discourse connectives for statistical machine
  translation.
\newblock In {\em Proceedings of the Joint Workshop on Exploiting Synergies
  between Information Retrieval and Machine Translation (ESIRMT) and Hybrid
  Approaches to Machine Translation (HyTra)}, pages 129--138, Avignon, France,
  April.

\bibitem[\protect\citename{Meyer and Webber}2013]{meyer2013machine}
Thomas Meyer and Bonnie Webber.
\newblock 2013.
\newblock Implicitation of discourse connectives in (machine) translation.
\newblock In {\em Proceedings of the Workshop on Discourse in Machine
  Translation}, pages 19--26, Sofia, Bulgaria, August.

\bibitem[\protect\citename{Mikolov \bgroup et al.\egroup
  }2013]{mikolov2013distributed}
Tomas Mikolov, Ilya Sutskever, Kai Chen, Greg~S Corrado, and Jeff Dean.
\newblock 2013.
\newblock Distributed representations of words and phrases and their
  compositionality.
\newblock In {\em Advances in neural information processing systems (NIPS)},
  pages 3111--3119, South Lake Tahoe, Nevada, US, December.

\bibitem[\protect\citename{Murray \bgroup et al.\egroup
  }2006]{murray2006incorporating}
Gabriel Murray, Steve Renals, Jean Carletta, and Johanna Moore.
\newblock 2006.
\newblock Incorporating speaker and discourse features into speech
  summarization.
\newblock In {\em Proceedings of the main conference on Human Language
  Technology Conference of the North American Chapter of the Association of
  Computational Linguistics (NAACL)}, pages 367--374, New York City, USA, June.

\bibitem[\protect\citename{Park and Cardie}2012]{park2012improving}
Joonsuk Park and Claire Cardie.
\newblock 2012.
\newblock Improving implicit discourse relation recognition through feature set
  optimization.
\newblock In {\em Proceedings of the 13th Annual Meeting of the Special
  Interest Group on Discourse and Dialogue (SIGDIAL)}, pages 108--112, Seoul,
  South Korea, July.

\bibitem[\protect\citename{Pitler \bgroup et al.\egroup
  }2009]{pitler-louis-nenkova:2009:ACLIJCNLP}
Emily Pitler, Annie Louis, and Ani Nenkova.
\newblock 2009.
\newblock Automatic sense prediction for implicit discourse relations in text.
\newblock In {\em Proceedings of the Joint Conference of the 47th Annual
  Meeting of he Association for Computational Linguistics and the 4th
  International Joint Conference on Natural Language Processing (ACL-IJCNLP)},
  pages 683--691, Suntec, Singapore, August.

\bibitem[\protect\citename{Prasad \bgroup et al.\egroup }2008]{prasad2008penn}
Rashmi Prasad, Nikhil Dinesh, Alan Lee, Eleni Miltsakaki, Livio Robaldo,
  Aravind~K Joshi, and Bonnie~L Webber.
\newblock 2008.
\newblock {The Penn Discourse TreeBank 2.0.}
\newblock In {\em {Proceedings of the Sixth conference on International
  Language Resources and Evaluation (LREC-2008)}}, pages 2961--2968, Marrakech,
  Morocco, May.

\bibitem[\protect\citename{Qin \bgroup et al.\egroup }2016a]{coling}
Lianhui Qin, Zhisong Zhang, and Hai Zhao.
\newblock 2016a.
\newblock Implicit discourse relation recognition with context-aware
  character-enhanced embeddings.
\newblock In {\em the 26th International Conference on Computational
  Linguistics (COLING)}, Osaka, Japan, December.

\bibitem[\protect\citename{Qin \bgroup et al.\egroup }2016b]{K16-2010}
Lianhui Qin, Zhisong Zhang, and Hai Zhao.
\newblock 2016b.
\newblock Shallow discourse parsing using convolutional neural network.
\newblock In {\em Proceedings of the CoNLL-16 shared task}, pages 70--77,
  Berlin, Germany, August.

\bibitem[\protect\citename{Rutherford and Xue}2014]{rutherford-xue:2014:EACL}
Attapol Rutherford and Nianwen Xue.
\newblock 2014.
\newblock Discovering implicit discourse relations through brown cluster pair
  representation and coreference patterns.
\newblock In {\em Proceedings of the 14th Conference of the European Chapter of
  the Association for Computational Linguistics (EACL)}, pages 645--654,
  Gothenburg, Sweden, April.

\bibitem[\protect\citename{Srivastava \bgroup et al.\egroup
  }2015]{srivastava2015highway}
Rupesh~Kumar Srivastava, Klaus Greff, and J{\"u}rgen Schmidhuber.
\newblock 2015.
\newblock Highway networks.
\newblock {\em arXiv preprint arXiv:1505.00387}.

\bibitem[\protect\citename{Wang and Lan}2016]{K16-2004}
Jianxiang Wang and Man Lan.
\newblock 2016.
\newblock {Two End-to-end Shallow Discourse Parsers for English and Chinese in
  CoNLL-2016 Shared Task}.
\newblock In {\em Proceedings of the {CoNLL-16} shared task}, pages 33--40,
  Berlin, Germany, August.

\bibitem[\protect\citename{Wang \bgroup et al.\egroup }2014]{wang2014neural}
Rui Wang, Hai Zhao, Bao-Liang Lu, Masao Utiyama, and Eiichiro Sumita.
\newblock 2014.
\newblock Neural network based bilingual language model growing for statistical
  machine translation.
\newblock In {\em Proceedings of the 2014 Conference on Empirical Methods in
  Natural Language Processing (EMNLP)}, pages 189--195, Doha, Qatar, October.

\bibitem[\protect\citename{Wang \bgroup et al.\egroup }2015]{wang2015word}
Peilu Wang, Yao Qian, Frank~K Soong, Lei He, and Hai Zhao.
\newblock 2015.
\newblock Word embedding for recurrent neural network based {TTS} synthesis.
\newblock In {\em 2015 IEEE International Conference on Acoustics, Speech and
  Signal Processing (ICASSP)}, pages 4879--4883, Brisbane, Australia.

\bibitem[\protect\citename{Wang \bgroup et al.\egroup }2016a]{wang2016learning}
Peilu Wang, Yao Qian, Frank~K. Soong, Lei He, and Hai Zhao.
\newblock 2016a.
\newblock Learning distributed word representations for bidirectional {LSTM}
  recurrent neural network.
\newblock In {\em Proceedings of the 2016 Conference of the North American
  Chapter of the Association for Computational Linguistics: Human Language
  Technologies (NAACL-HLT)}, pages 527--533, San Diego, California, June.

\bibitem[\protect\citename{Wang \bgroup et al.\egroup
  }2016b]{wang2016converting}
Rui Wang, Masao Utiyama, Isao Goto, Eiichiro Sumita, Hai Zhao, and Bao-Liang
  Lu.
\newblock 2016b.
\newblock Converting continuous-space language models into n-gram language
  models with efficient bilingual pruning for statistical machine translation.
\newblock {\em ACM Transactions on Asian and Low-Resource Language Information
  Processing}, 15(3):11.

\bibitem[\protect\citename{Xue \bgroup et al.\egroup }2015]{K15-2001}
Nianwen Xue, Hwee~Tou Ng, Sameer Pradhan, Rashmi Prasad, Christopher Bryant,
  and Attapol Rutherford.
\newblock 2015.
\newblock {The CoNLL-2015 Shared Task on Shallow Discourse Parsing}.
\newblock In {\em Proceedings of the CoNLL-15 shared task}, pages 1--16,
  Beijing, China, July.

\bibitem[\protect\citename{Xue \bgroup et al.\egroup }2016]{K16-2000}
Nianwen Xue, Hwee~Tou Ng, Sameer Pradhan, Attapol Rutherford, Bonnie Webber,
  Chuan Wang, and Hongmin Wang.
\newblock 2016.
\newblock {CoNLL 2016 Shared Task on Multilingual Shallow Discourse Parsing}.
\newblock In {\em {Proceedings of the CoNLL-16 shared task}}, pages 1--19,
  Berlin, Germany, August.

\bibitem[\protect\citename{Yoshida \bgroup et al.\egroup
  }2014]{yoshida2014dependency}
Yasuhisa Yoshida, Jun Suzuki, Tsutomu Hirao, and Masaaki Nagata.
\newblock 2014.
\newblock Dependency-based discourse parser for single-document summarization.
\newblock In {\em Proceedings of the 2014 Conference on Empirical Methods in
  Natural Language Processing (EMNLP)}, pages 1834--1839, Doha, Qatar, October.

\bibitem[\protect\citename{Zhang \bgroup et al.\egroup
  }2015]{zhang-EtAl:2015:EMNLP4}
Biao Zhang, Jinsong Su, Deyi Xiong, Yaojie Lu, Hong Duan, and Junfeng Yao.
\newblock 2015.
\newblock Shallow convolutional neural network for implicit discourse relation
  recognition.
\newblock In {\em Proceedings of the 2015 Conference on Empirical Methods in
  Natural Language Processing (EMNLP)}, pages 2230--2235, Lisbon, Portugal,
  September.

\bibitem[\protect\citename{Zhang \bgroup et al.\egroup
  }2016a]{zhang2016learning}
Jingyi Zhang, Masao Utiyama, Eiichro Sumita, Hai Zhao, Graham Neubig, and
  Satoshi Nakamura.
\newblock 2016a.
\newblock Learning local word reorderings for hierarchical phrase-based
  statistical machine translation.
\newblock {\em Machine Translation}, pages 1--18.

\bibitem[\protect\citename{Zhang \bgroup et al.\egroup
  }2016b]{zhang2016probabilistic}
Zhisong Zhang, Hai Zhao, and Lianhui Qin.
\newblock 2016b.
\newblock Probabilistic graph-based dependency parsing with convolutional
  neural network.
\newblock In {\em Proceedings of the 54th Annual Meeting of the Association for
  Computational Linguistics (ACL)}, pages 1382--1392, Berlin, Germany, August.

\bibitem[\protect\citename{Zhou \bgroup et al.\egroup
  }2010]{zhou2010predicting}
Zhi-Min Zhou, Yu~Xu, Zheng-Yu Niu, Man Lan, Jian Su, and Chew~Lim Tan.
\newblock 2010.
\newblock Predicting discourse connectives for implicit discourse relation
  recognition.
\newblock In {\em Proceedings of the 23rd International Conference on
  Computational Linguistics ({COLING})}, pages 1507--1514, Beijing, China,
  August.

\end{thebibliography}
