# Supplementary material
Source: ML conference proceedings conference paper supplement (https://aclanthology.org/D16-1246)
Supplement: Attachment [file D16-1246.Attachment.zip › emnlp-cam/emnlp2016.bib]

@inproceedings{prasad2008penn,
	title={{The Penn Discourse TreeBank 2.0.}},
	author={Prasad, Rashmi and Dinesh, Nikhil and Lee, Alan and Miltsakaki, Eleni and Robaldo, Livio and Joshi, Aravind K and Webber, Bonnie L},
	booktitle={{Proceedings of the Sixth conference on International Language Resources and Evaluation (LREC-2008)}},
	address = {Marrakech, Morocco},
	month = {May},
	pages     = {2961--2968},
	
	year={2008},
}

@InProceedings{pitler-louis-nenkova:2009:ACLIJCNLP,
	author    = {Pitler, Emily  and  Louis, Annie  and  Nenkova, Ani},
	title     = {Automatic sense prediction for implicit discourse relations in text},
	booktitle = {Proceedings of the Joint Conference of the 47th Annual Meeting of he Association for Computational Linguistics and the 4th International Joint Conference on Natural Language Processing (ACL-IJCNLP)},
	month     = {August},
	year      = {2009},
	address   = {Suntec, Singapore},
	pages     = {683--691},
	url       = {http://www.aclweb.org/anthology/P/P09/P09-1077}
}


@InProceedings{park2012improving,
	author    = {Park, Joonsuk  and  Cardie, Claire},
	title     = {Improving Implicit Discourse Relation Recognition Through Feature Set Optimization},
	booktitle = {Proceedings of the 13th Annual Meeting of the Special Interest Group on Discourse and Dialogue (SIGDIAL)},
	month     = {July},
	year      = {2012},
	address   = {Seoul, South Korea},
	pages     = {108--112},
	url       = {http://www.aclweb.org/anthology/W12-1614}
}


@InProceedings{rutherford-xue:2014:EACL,
	author    = {Rutherford, Attapol  and  Xue, Nianwen},
	title     = {Discovering Implicit Discourse Relations Through Brown Cluster Pair Representation and Coreference Patterns},
	booktitle = {Proceedings of the 14th Conference of the European Chapter of the Association for Computational Linguistics (EACL)},
	month     = {April},
	year      = {2014},
	address   = {Gothenburg, Sweden},
	pages     = {645--654},
	url       = {http://www.aclweb.org/anthology/E14-1068}
}


@InProceedings{zhang-EtAl:2015:EMNLP4,
	author    = {Zhang, Biao  and  Su, Jinsong  and  Xiong, Deyi  and  Lu, Yaojie  and  Duan, Hong  and  Yao, Junfeng},
	title     = {Shallow Convolutional Neural Network for Implicit Discourse Relation Recognition},
	booktitle = {Proceedings of the 2015 Conference on Empirical Methods in Natural Language Processing (EMNLP)},
	month     = {September},
	year      = {2015},
	address   = {Lisbon, Portugal},
	pages     = {2230--2235},
	url       = {http://aclweb.org/anthology/D15-1266}
}


@inproceedings{mikolov2013distributed,
	title={Distributed representations of words and phrases and their compositionality},
	author={Mikolov, Tomas and Sutskever, Ilya and Chen, Kai and Corrado, Greg S and Dean, Jeff},
	booktitle={Advances in neural information processing systems (NIPS)},
	address   = {South Lake Tahoe, Nevada, US},
	month     = {December},
	pages={3111--3119},
	year={2013}
}

@article{duchi2011adaptive,
	title={Adaptive subgradient methods for online learning and stochastic optimization},
	author={Duchi, John and Hazan, Elad and Singer, Yoram},
	journal={The Journal of Machine Learning Research},
	volume={12},
	pages={2121--2159},
	year={2011},
}

@article{TACL536,
	author = {Yangfeng Ji and Jacob Eisenstein},
	title = {One Vector is Not Enough: Entity-Augmented Distributed Semantics
	for Discourse Relations},
	journal = {Transactions of the Association for Computational Linguistics (TACL)},
	volume = {3},
	year = {2015},
	keywords = {},
	abstract = {Discourse relations bind smaller linguistic units into coherent
	texts. Automatically identifying discourse relations is difficult, because
	it requires understanding the semantics of the linked arguments. A more
	subtle challenge is that it is not enough to represent the meaning of each
	argument of a discourse relation, because the relation may depend on links
	between lower-level components, such as entity mentions. Our solution
	computes distributed meaning representations for each discourse argument by
	composition up the syntactic parse tree. We also perform a downward
	compositional pass to capture the meaning of coreferent entity mentions.
	Implicit discourse relations are then predicted from these two
	representations, obtaining substantial improvements on the Penn Discourse
	Treebank.},
	issn = {2307-387X},
	url =
	{https://tacl2013.cs.columbia.edu/ojs/index.php/tacl/article/view/536},
	pages = {329--344}
}

@InProceedings{zhou2010predicting,
	author    = {Zhou, Zhi-Min  and  Xu, Yu  and  Niu, Zheng-Yu  and  Lan, Man  and  Su, Jian  and  Tan, Chew Lim},
	title     = {Predicting Discourse Connectives for Implicit Discourse Relation Recognition},
	booktitle = {Proceedings of the 23rd International Conference on Computational Linguistics ({COLING})},
	month     = {August},
	year      = {2010},
	address   = {Beijing, China},
	pages     = {1507--1514},
	url       = {http://www.aclweb.org/anthology/C10-2172}
}


@InProceedings{mckeown2013aggregated,
	author    = {Biran, Or  and  McKeown, Kathleen},
	title     = {Aggregated Word Pair Features for Implicit Discourse Relation Disambiguation},
	booktitle = {Proceedings of the 51st Annual Meeting of the Association for Computational Linguistics (ACL)},
	month     = {August},
	year      = {2013},
	address   = {Sofia, Bulgaria},
	pages     = {69--73},
	url       = {http://www.aclweb.org/anthology/P13-2013}
}


@article{meyer2015disambiguating,
	title={Disambiguating discourse connectives for statistical machine translation},
	author={Meyer, Thomas and Hajlaoui, Najeh and Popescu-Belis, Andrei},
	journal={Audio, Speech, and Language Processing, IEEE/ACM Transactions on},
	volume={23},
	number={7},
	pages={1184--1197},
	year={2015},
}


@incollection{chardon2013measuring,
	title={Measuring the effect of discourse structure on sentiment analysis},
	author={Chardon, Baptiste and Benamara, Farah and Mathieu, Yannick and Popescu, Vladimir and Asher, Nicholas},
	booktitle={Computational Linguistics and Intelligent Text Processing},
	pages={25--37},
	year={2013},
}


@InProceedings{yoshida2014dependency,
	author    = {Yoshida, Yasuhisa  and  Suzuki, Jun  and  Hirao, Tsutomu  and  Nagata, Masaaki},
	title     = {Dependency-based Discourse Parser for Single-Document Summarization},
	booktitle = {Proceedings of the 2014 Conference on Empirical Methods in Natural Language Processing (EMNLP)},
	month     = {October},
	year      = {2014},
	address   = {Doha, Qatar},
	pages     = {1834--1839},
	url       = {http://www.aclweb.org/anthology/D14-1196}
}


@article{lin2014pdtb,
	title={A PDTB-styled end-to-end discourse parser},
	author={Lin, Ziheng and Ng, Hwee Tou and Kan, Min-Yen},
	journal={Natural Language Engineering},
	volume={20},
	number={02},
	pages={151--184},
	year={2014},
}

@InProceedings{rutherford2015improving,
	author    = {Rutherford, Attapol  and  Xue, Nianwen},
	title     = {Improving the Inference of Implicit Discourse Relations via Classifying Explicit Discourse Connectives},
	booktitle = {Proceedings of the 2015 Conference of the North American Chapter of the Association for Computational Linguistics (NAACL): Human Language Technologies },
	month     = {May--June},
	year      = {2015},
	address   = {Denver, Colorado},
	pages     = {799--808},
	url       = {http://www.aclweb.org/anthology/N15-1081}
}


@article{zhang2015sensitivity,
	title={A Sensitivity Analysis of (and Practitioners' Guide to) Convolutional Neural Networks for Sentence Classification},
	author={Zhang, Ye and Wallace, Byron},
	journal={arXiv preprint arXiv:1510.03820},
	year={2015}
}

@InProceedings{kalchbrenner-grefenstette-blunsom:2014:P14-1,
	author    = {Kalchbrenner, Nal  and  Grefenstette, Edward  and  Blunsom, Phil},
	title     = {A Convolutional Neural Network for Modelling Sentences},
	booktitle = {Proceedings of the 52nd Annual Meeting of the Association for Computational Linguistics (ACL)},
	month     = {June},
	year      = {2014},
	address   = {Baltimore, Maryland},
	pages     = {655--665},
	url       = {http://www.aclweb.org/anthology/P14-1062}
}


@InProceedings{kim:2014:EMNLP2014,
	author    = {Kim, Yoon},
	title     = {Convolutional Neural Networks for Sentence Classification},
	booktitle = {Proceedings of the 2014 Conference on Empirical Methods in Natural Language Processing (EMNLP)},
	month     = {October},
	year      = {2014},
	address   = {Doha, Qatar},
	pages     = {1746--1751},
	url       = {http://www.aclweb.org/anthology/D14-1181}
}


@article{hochreiter1997long,
	title={{Long Short-Term Memory}},
	author={Hochreiter, Sepp and Schmidhuber, J{\"u}rgen},
	journal={Neural computation},
	volume={9},
	number={8},
	pages={1735--1780},
	year={1997}
}

@article{chung2014empirical,
	title={Empirical evaluation of gated recurrent neural networks on sequence modeling},
	author={Chung, Junyoung and Gulcehre, Caglar and Cho, KyungHyun and Bengio, Yoshua},
	journal={arXiv preprint arXiv:1412.3555},
	year={2014}
}


@InProceedings{chen-EtAl:2015:EMNLP1,
	author    = {Chen, Xinchi  and  Qiu, Xipeng  and  Zhu, Chenxi  and  Wu, Shiyu  and  Huang, Xuanjing},
	title     = {Sentence Modeling with Gated Recursive Neural Network},
	booktitle = {Proceedings of the 2015 Conference on Empirical Methods in Natural Language Processing (EMNLP)},
	month     = {September},
	year      = {2015},
	address   = {Lisbon, Portugal},
	pages     = {793--798},
	url       = {http://aclweb.org/anthology/D15-1092}
}

@article{duchi2011adaptive,
	title={Adaptive subgradient methods for online learning and stochastic optimization},
	author={Duchi, John and Hazan, Elad and Singer, Yoram},
	journal={The Journal of Machine Learning Research},
	volume={12},
	pages={2121--2159},
	year={2011}
}

@misc{graffenglish,
	title={{English Gigaword Third Edition}, 2007, {LDC 2007T07}},
	author={David Graff and Junbo Kong and Ke Chen and Kazuaki Maeda}
}

@InProceedings{wang-lan:2015:CoNLL-ST,
	author    = {Wang, Jianxiang  and  Lan, Man},
	title     = {{A Refined End-to-End Discourse Parser}},
	booktitle = {Proceedings of the {CoNLL-15} shared task},
	month     = {July},
	year      = {2015},
	address   = {Beijing, China},
	pages     = {17--24},
	url       = {http://www.aclweb.org/anthology/K15-2002}
}

@inproceedings{litkowski1999question,
	title={Question-Answering Using Semantic Relation Triples.},
	author={Litkowski, Kenneth C},
	booktitle={TREC},
	year={1999}
}

@InProceedings{meyer2012using,
	author    = {Meyer, Thomas  and  Popescu-Belis, Andrei},
	title     = {Using Sense-labeled Discourse Connectives for Statistical Machine Translation},
	booktitle = {Proceedings of the Joint Workshop on Exploiting Synergies between Information Retrieval and Machine Translation (ESIRMT) and Hybrid Approaches to Machine Translation (HyTra)},
	month     = {April},
	year      = {2012},
	address   = {Avignon, France},
	pages     = {129--138},
	url       = {http://www.aclweb.org/anthology/W12-0117}
}


@inproceedings{murray2006incorporating,
	title={Incorporating speaker and discourse features into speech summarization},
	author={Murray, Gabriel and Renals, Steve and Carletta, Jean and Moore, Johanna},
	booktitle={Proceedings of the main conference on Human Language Technology Conference of the North American Chapter of the Association of Computational Linguistics (NAACL)},
	address   = {New York City, USA},
	month     = {June},
	pages={367--374},
	year={2006}
}


@article{hinton2012improving,
	title={Improving neural networks by preventing co-adaptation of feature detectors},
	author={Hinton, Geoffrey E and Srivastava, Nitish and Krizhevsky, Alex and Sutskever, Ilya and Salakhutdinov, Ruslan R},
	journal={arXiv preprint arXiv:1207.0580},
	year={2012}
}

@article{chung2014empirical,
	title={Empirical evaluation of gated recurrent neural networks on sequence modeling},
	author={Chung, Junyoung and Gulcehre, Caglar and Cho, KyungHyun and Bengio, Yoshua},
	journal={arXiv preprint arXiv:1412.3555},
	year={2014}
}


@InProceedings{braud2015comparing,
	author    = {Braud, Chlo\'{e}  and  Denis, Pascal},
	title     = {Comparing Word Representations for Implicit Discourse Relation Classification},
	booktitle = {Proceedings of the 2015 Conference on Empirical Methods in Natural Language Processing (EMNLP)},
	month     = {September},
	year      = {2015},
	address   = {Lisbon, Portugal},
	pages     = {2201--2211},
	url       = {http://aclweb.org/anthology/D15-1262}
}


@InProceedings{dos2014deep,
	author    = {dos Santos, Cicero  and  Gatti, Maira},
	title     = {Deep Convolutional Neural Networks for Sentiment Analysis of Short Texts},
	booktitle = {Proceedings of COLING 2014, the 25th International Conference on Computational Linguistics: Technical Papers},
	month     = {August},
	year      = {2014},
	address   = {Dublin, Ireland},
	pages     = {69--78},
	url       = {http://www.aclweb.org/anthology/C14-1008}
}


@InProceedings{liakata2013discourse,
	author    = {Liakata, Maria  and  Dobnik, Simon  and  Saha, Shyamasree  and  Batchelor, Colin  and  Rebholz-Schuhmann, Dietrich},
	title     = {A Discourse-Driven Content Model for Summarising Scientific Articles Evaluated in a Complex Question Answering Task},
	booktitle = {Proceedings of the 2013 Conference on Empirical Methods in Natural Language Processing (EMNLP)},
	month     = {October},
	year      = {2013},
	address   = {Seattle, Washington, USA},
	pages     = {747--757},
	url       = {http://www.aclweb.org/anthology/D13-1070}
}


@InProceedings{jansen2014discourse,
	author    = {Jansen, Peter  and  Surdeanu, Mihai  and  Clark, Peter},
	title     = {Discourse Complements Lexical Semantics for Non-factoid Answer Reranking},
	booktitle = {Proceedings of the 52nd Annual Meeting of the Association for Computational Linguistics (ACL)},
	month     = {June},
	year      = {2014},
	address   = {Baltimore, Maryland},
	pages     = {977--986},
	url       = {http://www.aclweb.org/anthology/P14-1092}
}


@InProceedings{meyer2013machine,
	author    = {Meyer, Thomas  and  Webber, Bonnie},
	title     = {Implicitation of Discourse Connectives in (Machine) Translation},
	booktitle = {Proceedings of the Workshop on Discourse in Machine Translation},
	month     = {August},
	year      = {2013},
	address   = {Sofia, Bulgaria},
	pages     = {19--26},
	url       = {http://www.aclweb.org/anthology/W13-3303}
}


@InProceedings{yoshida2014dependency,
	author    = {Zhang, Longkai  and  WANG, Houfeng},
	title     = {Go Climb a Dependency Tree and Correct the Grammatical Errors},
	booktitle = {Proceedings of the 2014 Conference on Empirical Methods in Natural Language Processing (EMNLP)},
	month     = {October},
	year      = {2014},
	address   = {Doha, Qatar},
	pages     = {266--277},
	url       = {http://www.aclweb.org/anthology/D14-1033}
}

@article{srivastava2015highway,
	title={Highway networks},
	author={Srivastava, Rupesh Kumar and Greff, Klaus and Schmidhuber, J{\"u}rgen},
	journal={arXiv preprint arXiv:1505.00387},
	year={2015}
}

@InProceedings{P16-1163,
	author    = {Chen, Jifan  and  Zhang, Qi  and  Liu, Pengfei  and  Qiu, Xipeng  and  Huang, Xuanjing},
	title     = {Implicit Discourse Relation Detection via a Deep Architecture with Gated Relevance Network},
	booktitle = {Proceedings of the 54th Annual Meeting of the Association for Computational Linguistics (ACL)},
	month     = {August},
	year      = {2016},
	address   = {Berlin, Germany},
	pages     = {1726--1735},
	url       = {http://www.aclweb.org/anthology/P16-1163}
}


@InProceedings{K16-2004,
	author    = {Wang, Jianxiang  and  Lan, Man},
	title     = {{Two End-to-end Shallow Discourse Parsers for English and Chinese in CoNLL-2016 Shared Task}},
	booktitle = {Proceedings of the {CoNLL-16} shared task},
	month     = {August},
	year      = {2016},
	address   = {Berlin, Germany},
	pages     = {33--40},
	url       = {http://anthology.aclweb.org/K16-2004}
}


@InProceedings{K16-2010,
	author    = {Qin, Lianhui  and  Zhang, Zhisong  and  Zhao, Hai},
	title     = {Shallow Discourse Parsing Using Convolutional Neural Network},
	booktitle = {Proceedings of the CoNLL-16 shared task},
	month     = {August},
	year      = {2016},
	address   = {Berlin, Germany},
	pages     = {70--77},
	url       = {http://anthology.aclweb.org/K16-2010}
}

@InProceedings{coling,
	author    = {Qin, Lianhui  and  Zhang, Zhisong  and  Zhao, Hai},
	title     = {Implicit Discourse Relation Recognition with Context-aware Character-enhanced Embeddings},
	booktitle = {the 26th International Conference on Computational Linguistics (COLING)},
	month     = {December},
	year      = {2016},
	address   = {Osaka, Japan},
}


@InProceedings{K16-2008,
	author    = {Li, Zhongyi  and  Zhao, Hai  and  Pang, Chenxi  and  Wang, Lili  and  Wang, Huan},
	title     = {A Constituent Syntactic Parse Tree Based Discourse Parser},
	booktitle = {Proceedings of the CoNLL-16 shared task},
	month     = {August},
	year      = {2016},
	address   = {Berlin, Germany},
	pages     = {60--64},
	url       = {http://anthology.aclweb.org/K16-2008}
}


@InProceedings{K15-2005,
	author    = {Chen, Changge  and  Wang, Peilu  and  Zhao, Hai},
	title     = {Shallow Discourse Parsing Using Constituent Parsing Tree},
	booktitle = {Proceedings of the CoNLL-15 shared task},
	month     = {July},
	year      = {2015},
	address   = {Beijing, China},
	pages     = {37--41},
	url       = {http://www.aclweb.org/anthology/K15-2005}
}


@InProceedings{wang2016learning,
	author    = {Wang, Peilu  and  Qian, Yao  and  Soong, Frank K.  and  He, Lei  and  Zhao, Hai},
	title     = {Learning Distributed Word Representations For Bidirectional {LSTM} Recurrent Neural Network},
	booktitle = {Proceedings of the 2016 Conference of the North American Chapter of the Association for Computational Linguistics: Human Language Technologies (NAACL-HLT)},
	month     = {June},
	year      = {2016},
	address   = {San Diego, California},
	pages     = {527--533},
	url       = {http://www.aclweb.org/anthology/N16-1064}
}


@InProceedings{zhang2016probabilistic,
	author    = {Zhang, Zhisong  and  Zhao, Hai  and  Qin, Lianhui},
	title     = {Probabilistic Graph-based Dependency Parsing with Convolutional Neural Network},
	booktitle = {Proceedings of the 54th Annual Meeting of the Association for Computational Linguistics (ACL)},
	month     = {August},
	year      = {2016},
	address   = {Berlin, Germany},
	pages     = {1382--1392},
	url       = {http://www.aclweb.org/anthology/P16-1131}
}


@inproceedings{wang2015word,
	title={Word embedding for recurrent neural network based {TTS} synthesis},
	author={Wang, Peilu and Qian, Yao and Soong, Frank K and He, Lei and Zhao, Hai},
	booktitle={2015 IEEE International Conference on Acoustics, Speech and Signal Processing (ICASSP)},
	pages={4879--4883},
	year={2015},
	address   = {Brisbane, Australia}
}


@InProceedings{wang2014neural,
	author    = {Wang, Rui  and  Zhao, Hai  and  Lu, Bao-Liang  and  Utiyama, Masao  and  Sumita, Eiichiro},
	title     = {Neural Network Based Bilingual Language Model Growing for Statistical Machine Translation},
	booktitle = {Proceedings of the 2014 Conference on Empirical Methods in Natural Language Processing (EMNLP)},
	month     = {October},
	year      = {2014},
	address   = {Doha, Qatar},
	pages     = {189--195},
	url       = {http://www.aclweb.org/anthology/D14-1023}
}


@InProceedings{P16-1039,
	author    = {Cai, Deng  and  Zhao, Hai},
	title     = {{Neural Word Segmentation Learning for Chinese}},
	booktitle = {Proceedings of the 54th Annual Meeting of the Association for Computational Linguistics (ACL)},
	month     = {August},
	year      = {2016},
	address   = {Berlin, Germany},
	pages     = {409--420},
	url       = {http://www.aclweb.org/anthology/P16-1039}
}


@InProceedings{K16-2000,
	author    = {Xue, Nianwen  and  Ng, Hwee Tou  and  Pradhan, Sameer  and  Rutherford, Attapol  and  Webber, Bonnie  and  Wang, Chuan  and  Wang, Hongmin},
	title     = {{CoNLL 2016 Shared Task on Multilingual Shallow Discourse Parsing}},
	booktitle = {{Proceedings of the CoNLL-16 shared task}},
	month     = {August},
	year      = {2016},
	address   = {Berlin, Germany},
	pages     = {1--19},
	url       = {http://anthology.aclweb.org/K16-2001}
}

@InProceedings{K15-2001,
	author    = {Xue, Nianwen  and  Ng, Hwee Tou  and  Pradhan, Sameer  and  Prasad, Rashmi  and  Bryant, Christopher  and  Rutherford, Attapol},
	title     = {{The CoNLL-2015 Shared Task on Shallow Discourse Parsing}},
	booktitle = {Proceedings of the CoNLL-15 shared task},
	month     = {July},
	year      = {2015},
	address   = {Beijing, China},
	pages     = {1--16},
	url       = {http://www.aclweb.org/anthology/K15-2001}
}


@article{wang2016converting,
	title={Converting Continuous-Space Language Models into N-gram Language Models with Efficient Bilingual Pruning for Statistical Machine Translation},
	author={Wang, Rui and Utiyama, Masao and Goto, Isao and Sumita, Eiichiro and Zhao, Hai and Lu, Bao-Liang},
	journal={ACM Transactions on Asian and Low-Resource Language Information Processing},
	volume={15},
	number={3},
	pages={11},
	year={2016},
}

@article{zhang2016learning,
	title={Learning local word reorderings for hierarchical phrase-based statistical machine translation},
	author={Zhang, Jingyi and Utiyama, Masao and Sumita, Eiichro and Zhao, Hai and Neubig, Graham and Nakamura, Satoshi},
	journal={Machine Translation},
	pages={1--18},
	year={2016},
}


@InProceedings{jia2014joint,
	author    = {Jia, Zhongye  and  Zhao, Hai},
	title     = {{A Joint Graph Model for Pinyin-to-Chinese Conversion with Typo Correction}},
	booktitle = {Proceedings of the 52nd Annual Meeting of the Association for Computational Linguistics (ACL)},
	month     = {June},
	year      = {2014},
	address   = {Baltimore, Maryland},
	pages     = {1512--1523},
	url       = {http://www.aclweb.org/anthology/P14-1142}
}
