# Supplementary material
Source: ML conference proceedings conference paper supplement (https://aclanthology.org/D16-1246)
Supplement: Attachment [file D16-1246.Attachment.zip › emnlp-cam/emnlp2016.blg]

This is BibTeX, Version 0.99d (TeX Live 2015)
Capacity: max_strings=35307, hash_size=35307, hash_prime=30011
The top-level auxiliary file: emnlp2016.aux
The style file: emnlp2016.bst
Database file #1: emnlp2016.bib
Repeated entry---line 245 of file emnlp2016.bib
 : @article{duchi2011adaptive
 :                           ,
I'm skipping whatever remains of this entry
Repeated entry---line 307 of file emnlp2016.bib
 : @article{chung2014empirical
 :                            ,
I'm skipping whatever remains of this entry
Repeated entry---line 377 of file emnlp2016.bib
 : @inproceedings{yoshida2014dependency
 :                                     ,
I'm skipping whatever remains of this entry
You've used 39 entries,
            2490 wiz_defined-function locations,
            780 strings with 13513 characters,
and the built_in function-call counts, 21295 in all, are:
= -- 2337
> -- 836
< -- 31
+ -- 295
- -- 288
* -- 1540
:= -- 3158
add.period$ -- 156
call.type$ -- 39
change.case$ -- 300
chr.to.int$ -- 36
cite$ -- 39
duplicate$ -- 953
empty$ -- 1551
format.name$ -- 338
if$ -- 4698
int.to.chr$ -- 4
int.to.str$ -- 0
missing$ -- 39
newline$ -- 237
num.names$ -- 117
pop$ -- 354
preamble$ -- 1
purify$ -- 339
quote$ -- 0
skip$ -- 771
stack$ -- 0
substring$ -- 1310
swap$ -- 355
text.length$ -- 31
text.prefix$ -- 0
top$ -- 0
type$ -- 312
warning$ -- 0
while$ -- 180
width$ -- 44
write$ -- 606
(There were 3 error messages)
