# Supplementary material
Source: ML conference proceedings conference paper supplement (https://aclanthology.org/D16-1246)
Supplement: Attachment [file D16-1246.Attachment.zip › emnlp-cam/emnlp2016.log]

This is pdfTeX, Version 3.14159265-2.6-1.40.16 (TeX Live 2015) (preloaded format=pdflatex 2016.2.16)  23 SEP 2016 16:08
entering extended mode
 restricted \write18 enabled.
 %&-line parsing enabled.
**emnlp2016.tex
(./emnlp2016.tex
LaTeX2e <2015/01/01>
Babel <3.9l> and hyphenation patterns for 79 languages loaded.
(/usr/local/texlive/2015/texmf-dist/tex/latex/base/article.cls
Document Class: article 2014/09/29 v1.4h Standard LaTeX document class
(/usr/local/texlive/2015/texmf-dist/tex/latex/base/size11.clo
File: size11.clo 2014/09/29 v1.4h Standard LaTeX file (size option)
)
\c@part=\count79
\c@section=\count80
\c@subsection=\count81
\c@subsubsection=\count82
\c@paragraph=\count83
\c@subparagraph=\count84
\c@figure=\count85
\c@table=\count86
\abovecaptionskip=\skip41
\belowcaptionskip=\skip42
\bibindent=\dimen102
)
(./emnlp2016.sty
Conference Style for EMNLP 2016 -- released April 2016
\titlebox=\skip43
\emnlprulerbox=\box26
\emnlprulercount=\count87
\emnlpruleroffset=\dimen103
\cv@lineheight=\dimen104
\cv@boxheight=\dimen105
\cv@tmpbox=\box27
\cv@refno=\count88
\cv@tot=\count89
\cv@tmpc@=\count90
\cv@tmpc=\count91
) (/usr/local/texlive/2015/texmf-dist/tex/latex/psnfss/times.sty
Package: times 2005/04/12 PSNFSS-v9.2a (SPQR) 
)
(/usr/local/texlive/2015/texmf-dist/tex/latex/base/latexsym.sty
Package: latexsym 1998/08/17 v2.2e Standard LaTeX package (lasy symbols)
\symlasy=\mathgroup4
LaTeX Font Info:    Overwriting symbol font `lasy' in version `bold'
(Font)                  U/lasy/m/n --> U/lasy/b/n on input line 52.
)
(/usr/local/texlive/2015/texmf-dist/tex/latex/diagbox/diagbox.sty
Package: diagbox 2011/11/23 v2.0 Making table heads with diagonal lines

(/usr/local/texlive/2015/texmf-dist/tex/latex/graphics/keyval.sty
Package: keyval 2014/10/28 v1.15 key=value parser (DPC)
\KV@toks@=\toks14
)
(/usr/local/texlive/2015/texmf-dist/tex/latex/pict2e/pict2e.sty
Package: pict2e 2014/01/12 v0.2z Improved picture commands (HjG,RN,JT)

(/usr/local/texlive/2015/texmf-dist/tex/latex/pict2e/pict2e.cfg
File: pict2e.cfg 2011/04/05 v0.1t pict2e configuration for teTeX/TeXLive
)
Package pict2e Info: Driver file: pdftex.def on input line 119.

(/usr/local/texlive/2015/texmf-dist/tex/latex/pdftex-def/pdftex.def
File: pdftex.def 2011/05/27 v0.06d Graphics/color for pdfTeX

(/usr/local/texlive/2015/texmf-dist/tex/generic/oberdiek/infwarerr.sty
Package: infwarerr 2010/04/08 v1.3 Providing info/warning/error messages (HO)
)
(/usr/local/texlive/2015/texmf-dist/tex/generic/oberdiek/ltxcmds.sty
Package: ltxcmds 2011/11/09 v1.22 LaTeX kernel commands for general use (HO)
)
\Gread@gobject=\count92
)
Package pict2e Info: Driver file for pict2e: p2e-pdftex.def on input line 121.

(/usr/local/texlive/2015/texmf-dist/tex/latex/pict2e/p2e-pdftex.def
File: p2e-pdftex.def 2011/04/05 v0.1t Driver-dependant file (RN,HjG,JT)
)
(/usr/local/texlive/2015/texmf-dist/tex/latex/graphics/trig.sty
Package: trig 1999/03/16 v1.09 sin cos tan (DPC)
)
\pIIe@GRAPH=\toks15
\@arclen=\dimen106
\@arcrad=\dimen107
\@tempdimd=\dimen108
)
(/usr/local/texlive/2015/texmf-dist/tex/latex/fp/fp.sty
Package: fp 1995/04/02

`Fixed Point Package', Version 0.8, April 2, 1995 (C) Michael Mehlich
(/usr/local/texlive/2015/texmf-dist/tex/latex/fp/defpattern.sty
Package: defpattern 1994/10/12
\actioncount=\count93
)
(/usr/local/texlive/2015/texmf-dist/tex/latex/fp/fp-basic.sty
Package: fp-basic 1996/05/13
\FP@xs=\count94
\FP@xia=\count95
\FP@xib=\count96
\FP@xfa=\count97
\FP@xfb=\count98
\FP@rega=\count99
\FP@regb=\count100
\FP@regs=\count101
\FP@times=\count102
)
(/usr/local/texlive/2015/texmf-dist/tex/latex/fp/fp-addons.sty
Package: fp-addons 1995/03/15
)
(/usr/local/texlive/2015/texmf-dist/tex/latex/fp/fp-snap.sty
Package: fp-snap 1995/04/05
)
(/usr/local/texlive/2015/texmf-dist/tex/latex/fp/fp-exp.sty
Package: fp-exp 1995/04/03
)
(/usr/local/texlive/2015/texmf-dist/tex/latex/fp/fp-trigo.sty
Package: fp-trigo 1995/04/14
)
(/usr/local/texlive/2015/texmf-dist/tex/latex/fp/fp-pas.sty
Package: fp-pas 1994/08/29
)
(/usr/local/texlive/2015/texmf-dist/tex/latex/fp/fp-random.sty
Package: fp-random 1995/02/23
\FPseed=\count103
)
(/usr/local/texlive/2015/texmf-dist/tex/latex/fp/fp-eqn.sty
Package: fp-eqn 1995/04/03
)
(/usr/local/texlive/2015/texmf-dist/tex/latex/fp/fp-upn.sty
Package: fp-upn 1996/10/21
)
(/usr/local/texlive/2015/texmf-dist/tex/latex/fp/fp-eval.sty
Package: fp-eval 1995/04/03
))
\diagbox@boxa=\box28
\diagbox@boxb=\box29
\diagbox@boxm=\box30
\diagbox@wd=\dimen109
\diagbox@ht=\dimen110
\diagbox@sepl=\dimen111
\diagbox@sepr=\dimen112
)
(/usr/local/texlive/2015/texmf-dist/tex/latex/amsmath/amsmath.sty
Package: amsmath 2013/01/14 v2.14 AMS math features
\@mathmargin=\skip44

For additional information on amsmath, use the `?' option.
(/usr/local/texlive/2015/texmf-dist/tex/latex/amsmath/amstext.sty
Package: amstext 2000/06/29 v2.01

(/usr/local/texlive/2015/texmf-dist/tex/latex/amsmath/amsgen.sty
File: amsgen.sty 1999/11/30 v2.0
\@emptytoks=\toks16
\ex@=\dimen113
))
(/usr/local/texlive/2015/texmf-dist/tex/latex/amsmath/amsbsy.sty
Package: amsbsy 1999/11/29 v1.2d
\pmbraise@=\dimen114
)
(/usr/local/texlive/2015/texmf-dist/tex/latex/amsmath/amsopn.sty
Package: amsopn 1999/12/14 v2.01 operator names
)
\inf@bad=\count104
LaTeX Info: Redefining \frac on input line 210.
\uproot@=\count105
\leftroot@=\count106
LaTeX Info: Redefining \overline on input line 306.
\classnum@=\count107
\DOTSCASE@=\count108
LaTeX Info: Redefining \ldots on input line 378.
LaTeX Info: Redefining \dots on input line 381.
LaTeX Info: Redefining \cdots on input line 466.
\Mathstrutbox@=\box31
\strutbox@=\box32
\big@size=\dimen115
LaTeX Font Info:    Redeclaring font encoding OML on input line 566.
LaTeX Font Info:    Redeclaring font encoding OMS on input line 567.
\macc@depth=\count109
\c@MaxMatrixCols=\count110
\dotsspace@=\muskip10
\c@parentequation=\count111
\dspbrk@lvl=\count112
\tag@help=\toks17
\row@=\count113
\column@=\count114
\maxfields@=\count115
\andhelp@=\toks18
\eqnshift@=\dimen116
\alignsep@=\dimen117
\tagshift@=\dimen118
\tagwidth@=\dimen119
\totwidth@=\dimen120
\lineht@=\dimen121
\@envbody=\toks19
\multlinegap=\skip45
\multlinetaggap=\skip46
\mathdisplay@stack=\toks20
LaTeX Info: Redefining \[ on input line 2665.
LaTeX Info: Redefining \] on input line 2666.
)
(/usr/local/texlive/2015/texmf-dist/tex/latex/amsfonts/amsfonts.sty
Package: amsfonts 2013/01/14 v3.01 Basic AMSFonts support
\symAMSa=\mathgroup5
\symAMSb=\mathgroup6
LaTeX Font Info:    Overwriting math alphabet `\mathfrak' in version `bold'
(Font)                  U/euf/m/n --> U/euf/b/n on input line 106.
)
(/usr/local/texlive/2015/texmf-dist/tex/latex/graphics/graphicx.sty
Package: graphicx 2014/10/28 v1.0g Enhanced LaTeX Graphics (DPC,SPQR)

(/usr/local/texlive/2015/texmf-dist/tex/latex/graphics/graphics.sty
Package: graphics 2014/10/28 v1.0p Standard LaTeX Graphics (DPC,SPQR)

(/usr/local/texlive/2015/texmf-dist/tex/latex/latexconfig/graphics.cfg
File: graphics.cfg 2010/04/23 v1.9 graphics configuration of TeX Live
)
Package graphics Info: Driver file: pdftex.def on input line 94.
)
\Gin@req@height=\dimen122
\Gin@req@width=\dimen123
)
(/usr/local/texlive/2015/texmf-dist/tex/latex/tools/array.sty
Package: array 2014/10/28 v2.4c Tabular extension package (FMi)
\col@sep=\dimen124
\extrarowheight=\dimen125
\NC@list=\toks21
\extratabsurround=\skip47
\backup@length=\skip48
)
(/usr/local/texlive/2015/texmf-dist/tex/latex/multirow/multirow.sty
\bigstrutjot=\dimen126
)
(/usr/local/texlive/2015/texmf-dist/tex/latex/url/url.sty
\Urlmuskip=\muskip11
Package: url 2013/09/16  ver 3.4  Verb mode for urls, etc.
) (./emnlp2016.aux)
\openout1 = `emnlp2016.aux'.

LaTeX Font Info:    Checking defaults for OML/cmm/m/it on input line 44.
LaTeX Font Info:    ... okay on input line 44.
LaTeX Font Info:    Checking defaults for T1/cmr/m/n on input line 44.
LaTeX Font Info:    ... okay on input line 44.
LaTeX Font Info:    Checking defaults for OT1/cmr/m/n on input line 44.
LaTeX Font Info:    ... okay on input line 44.
LaTeX Font Info:    Checking defaults for OMS/cmsy/m/n on input line 44.
LaTeX Font Info:    ... okay on input line 44.
LaTeX Font Info:    Checking defaults for OMX/cmex/m/n on input line 44.
LaTeX Font Info:    ... okay on input line 44.
LaTeX Font Info:    Checking defaults for U/cmr/m/n on input line 44.
LaTeX Font Info:    ... okay on input line 44.
LaTeX Font Info:    Try loading font information for OT1+ptm on input line 44.

(/usr/local/texlive/2015/texmf-dist/tex/latex/psnfss/ot1ptm.fd
File: ot1ptm.fd 2001/06/04 font definitions for OT1/ptm.
)
ABD: EveryShipout initializing macros
(/usr/local/texlive/2015/texmf-dist/tex/context/base/supp-pdf.mkii
[Loading MPS to PDF converter (version 2006.09.02).]
\scratchcounter=\count116
\scratchdimen=\dimen127
\scratchbox=\box33
\nofMPsegments=\count117
\nofMParguments=\count118
\everyMPshowfont=\toks22
\MPscratchCnt=\count119
\MPscratchDim=\dimen128
\MPnumerator=\count120
\makeMPintoPDFobject=\count121
\everyMPtoPDFconversion=\toks23
) (/usr/local/texlive/2015/texmf-dist/tex/generic/oberdiek/pdftexcmds.sty
Package: pdftexcmds 2011/11/29 v0.20 Utility functions of pdfTeX for LuaTeX (HO
)

(/usr/local/texlive/2015/texmf-dist/tex/generic/oberdiek/ifluatex.sty
Package: ifluatex 2010/03/01 v1.3 Provides the ifluatex switch (HO)
Package ifluatex Info: LuaTeX not detected.
)
(/usr/local/texlive/2015/texmf-dist/tex/generic/oberdiek/ifpdf.sty
Package: ifpdf 2011/01/30 v2.3 Provides the ifpdf switch (HO)
Package ifpdf Info: pdfTeX in PDF mode is detected.
)
Package pdftexcmds Info: LuaTeX not detected.
Package pdftexcmds Info: \pdf@primitive is available.
Package pdftexcmds Info: \pdf@ifprimitive is available.
Package pdftexcmds Info: \pdfdraftmode found.
)
(/usr/local/texlive/2015/texmf-dist/tex/latex/oberdiek/epstopdf-base.sty
Package: epstopdf-base 2010/02/09 v2.5 Base part for package epstopdf

(/usr/local/texlive/2015/texmf-dist/tex/latex/oberdiek/grfext.sty
Package: grfext 2010/08/19 v1.1 Manage graphics extensions (HO)

(/usr/local/texlive/2015/texmf-dist/tex/generic/oberdiek/kvdefinekeys.sty
Package: kvdefinekeys 2011/04/07 v1.3 Define keys (HO)
))
(/usr/local/texlive/2015/texmf-dist/tex/latex/oberdiek/kvoptions.sty
Package: kvoptions 2011/06/30 v3.11 Key value format for package options (HO)

(/usr/local/texlive/2015/texmf-dist/tex/generic/oberdiek/kvsetkeys.sty
Package: kvsetkeys 2012/04/25 v1.16 Key value parser (HO)

(/usr/local/texlive/2015/texmf-dist/tex/generic/oberdiek/etexcmds.sty
Package: etexcmds 2011/02/16 v1.5 Avoid name clashes with e-TeX commands (HO)
Package etexcmds Info: Could not find \expanded.
(etexcmds)             That can mean that you are not using pdfTeX 1.50 or
(etexcmds)             that some package has redefined \expanded.
(etexcmds)             In the latter case, load this package earlier.
)))
Package grfext Info: Graphics extension search list:
(grfext)             [.png,.pdf,.jpg,.mps,.jpeg,.jbig2,.jb2,.PNG,.PDF,.JPG,.JPE
G,.JBIG2,.JB2,.eps]
(grfext)             \AppendGraphicsExtensions on input line 452.

(/usr/local/texlive/2015/texmf-dist/tex/latex/latexconfig/epstopdf-sys.cfg
File: epstopdf-sys.cfg 2010/07/13 v1.3 Configuration of (r)epstopdf for TeX Liv
e
))
LaTeX Font Info:    Font shape `OT1/ptm/bx/n' in size <14.4> not available
(Font)              Font shape `OT1/ptm/b/n' tried instead on input line 46.
LaTeX Font Info:    Try loading font information for U+lasy on input line 46.

(/usr/local/texlive/2015/texmf-dist/tex/latex/base/ulasy.fd
File: ulasy.fd 1998/08/17 v2.2e LaTeX symbol font definitions
)
LaTeX Font Info:    Try loading font information for U+msa on input line 46.

(/usr/local/texlive/2015/texmf-dist/tex/latex/amsfonts/umsa.fd
File: umsa.fd 2013/01/14 v3.01 AMS symbols A
)
LaTeX Font Info:    Try loading font information for U+msb on input line 46.

(/usr/local/texlive/2015/texmf-dist/tex/latex/amsfonts/umsb.fd
File: umsb.fd 2013/01/14 v3.01 AMS symbols B
)
LaTeX Font Info:    Font shape `OT1/ptm/bx/n' in size <12> not available
(Font)              Font shape `OT1/ptm/b/n' tried instead on input line 46.
LaTeX Font Info:    Try loading font information for OT1+pcr on input line 46.

(/usr/local/texlive/2015/texmf-dist/tex/latex/psnfss/ot1pcr.fd
File: ot1pcr.fd 2001/06/04 font definitions for OT1/pcr.
)
LaTeX Font Info:    Try loading font information for OMS+pcr on input line 46.

(/usr/local/texlive/2015/texmf-dist/tex/latex/psnfss/omspcr.fd
File: omspcr.fd 
)
LaTeX Font Info:    Font shape `OMS/pcr/m/n' in size <12> not available
(Font)              Font shape `OMS/cmsy/m/n' tried instead on input line 46.

Underfull \hbox (badness 1226) in paragraph at lines 59--60
\OT1/ptm/m/n/10.95 tures[] (Zhou et al., 2010; Ruther-ford and Xue,
 []


Underfull \vbox (badness 10000) has occurred while \output is active []

 [1{/usr/local/texlive/2015/texmf-var/fonts/map/pdftex/updmap/pdftex.map}


]
LaTeX Font Info:    Font shape `OT1/ptm/bx/n' in size <10.95> not available
(Font)              Font shape `OT1/ptm/b/n' tried instead on input line 75.
LaTeX Font Info:    Font shape `OT1/ptm/bx/n' in size <9> not available
(Font)              Font shape `OT1/ptm/b/n' tried instead on input line 79.

Underfull \hbox (badness 1158) in paragraph at lines 89--91
\OT1/ptm/m/n/10.95 As CNN has been broadly adopted for mod-el-
 []

<cgnn.pdf, id=15, 435.10455pt x 730.191pt>
File: cgnn.pdf Graphic file (type pdf)
 <use cgnn.pdf>
Package pdftex.def Info: cgnn.pdf used on input line 94.
(pdftex.def)             Requested size: 234.87749pt x 394.1747pt.

Overfull \hbox (7.22688pt too wide) in paragraph at lines 94--95
 [][] 
 []


Underfull \vbox (badness 10000) has occurred while \output is active []

 [2 <./cgnn.pdf>]
Underfull \hbox (badness 2285) in paragraph at lines 104--105
[]\OT1/ptm/m/n/10.95 Motivated by the idea of high-way net-work,
 []


Underfull \vbox (badness 4872) has occurred while \output is active []

 [3]
LaTeX Font Info:    Font shape `OT1/ptm/bx/n' in size <10> not available
(Font)              Font shape `OT1/ptm/b/n' tried instead on input line 189.

Overfull \hbox (2.39867pt too wide) in paragraph at lines 202--233
 [][] 
 []


Underfull \hbox (badness 1688) in paragraph at lines 252--253
\OT1/ptm/m/n/10.95 For trans-for-ma-tion of sen-tence vec-tors, a sim-
 []

[4]
Underfull \vbox (badness 10000) has occurred while \output is active []


Underfull \hbox (badness 1320) in paragraph at lines 266--267
[]\OT1/ptm/m/n/10.95 Our model achieves F-measure im-prove-ments
 []

(./emnlp2016.bbl
Underfull \vbox (badness 10000) has occurred while \output is active []

 [5]
[6]
Underfull \hbox (badness 1430) in paragraph at lines 219--223
[]\OT1/ptm/m/n/10 Rupesh Ku-mar Sri-vas-tava, Klaus Gr-eff, and J[]urgen
 []


Underfull \hbox (badness 1142) in paragraph at lines 284--289
[]\OT1/ptm/m/n/10 Yasuhisa Yoshida, Jun Suzuki, Tsu-tomu Hi-rao, and
 []


Underfull \hbox (badness 3189) in paragraph at lines 302--308
\OT1/ptm/m/n/10 Learn-ing lo-cal word re-order-ings for hi-er-ar-chi-cal
 []

[7]) [8

] (./emnlp2016.aux) )
(\end occurred when \iffalse on line 303 was incomplete) 
Here is how much of TeX's memory you used:
 3484 strings out of 493089
 46093 string characters out of 6134842
 144497 words of memory out of 5000000
 6824 multiletter control sequences out of 15000+600000
 46059 words of font info for 108 fonts, out of 8000000 for 9000
 1141 hyphenation exceptions out of 8191
 37i,12n,24p,1781b,283s stack positions out of 5000i,500n,10000p,200000b,80000s
{/usr/local/texlive/201
5/texmf-dist/fonts/enc/dvips/base/8r.enc}</usr/local/texlive/2015/texmf-dist/fo
nts/type1/public/amsfonts/cm/cmbx10.pfb></usr/local/texlive/2015/texmf-dist/fon
ts/type1/public/amsfonts/cm/cmex10.pfb></usr/local/texlive/2015/texmf-dist/font
s/type1/public/amsfonts/cm/cmmi10.pfb></usr/local/texlive/2015/texmf-dist/fonts
/type1/public/amsfonts/cm/cmmi8.pfb></usr/local/texlive/2015/texmf-dist/fonts/t
ype1/public/amsfonts/cm/cmmi9.pfb></usr/local/texlive/2015/texmf-dist/fonts/typ
e1/public/amsfonts/cm/cmr10.pfb></usr/local/texlive/2015/texmf-dist/fonts/type1
/public/amsfonts/cm/cmr6.pfb></usr/local/texlive/2015/texmf-dist/fonts/type1/pu
blic/amsfonts/cm/cmr7.pfb></usr/local/texlive/2015/texmf-dist/fonts/type1/publi
c/amsfonts/cm/cmr8.pfb></usr/local/texlive/2015/texmf-dist/fonts/type1/public/a
msfonts/cm/cmsy10.pfb></usr/local/texlive/2015/texmf-dist/fonts/type1/public/am
sfonts/cm/cmsy6.pfb></usr/local/texlive/2015/texmf-dist/fonts/type1/public/amsf
onts/cm/cmsy8.pfb></usr/local/texlive/2015/texmf-dist/fonts/type1/urw/courier/u
crr8a.pfb></usr/local/texlive/2015/texmf-dist/fonts/type1/urw/times/utmb8a.pfb>
</usr/local/texlive/2015/texmf-dist/fonts/type1/urw/times/utmr8a.pfb></usr/loca
l/texlive/2015/texmf-dist/fonts/type1/urw/times/utmri8a.pfb>
Output written on emnlp2016.pdf (8 pages, 496101 bytes).
PDF statistics:
 136 PDF objects out of 1000 (max. 8388607)
 87 compressed objects within 1 object stream
 0 named destinations out of 1000 (max. 500000)
 6 words of extra memory for PDF output out of 10000 (max. 10000000)
