# Supplementary material
Source: ML conference proceedings conference paper supplement (https://aclanthology.org/D16-1246)

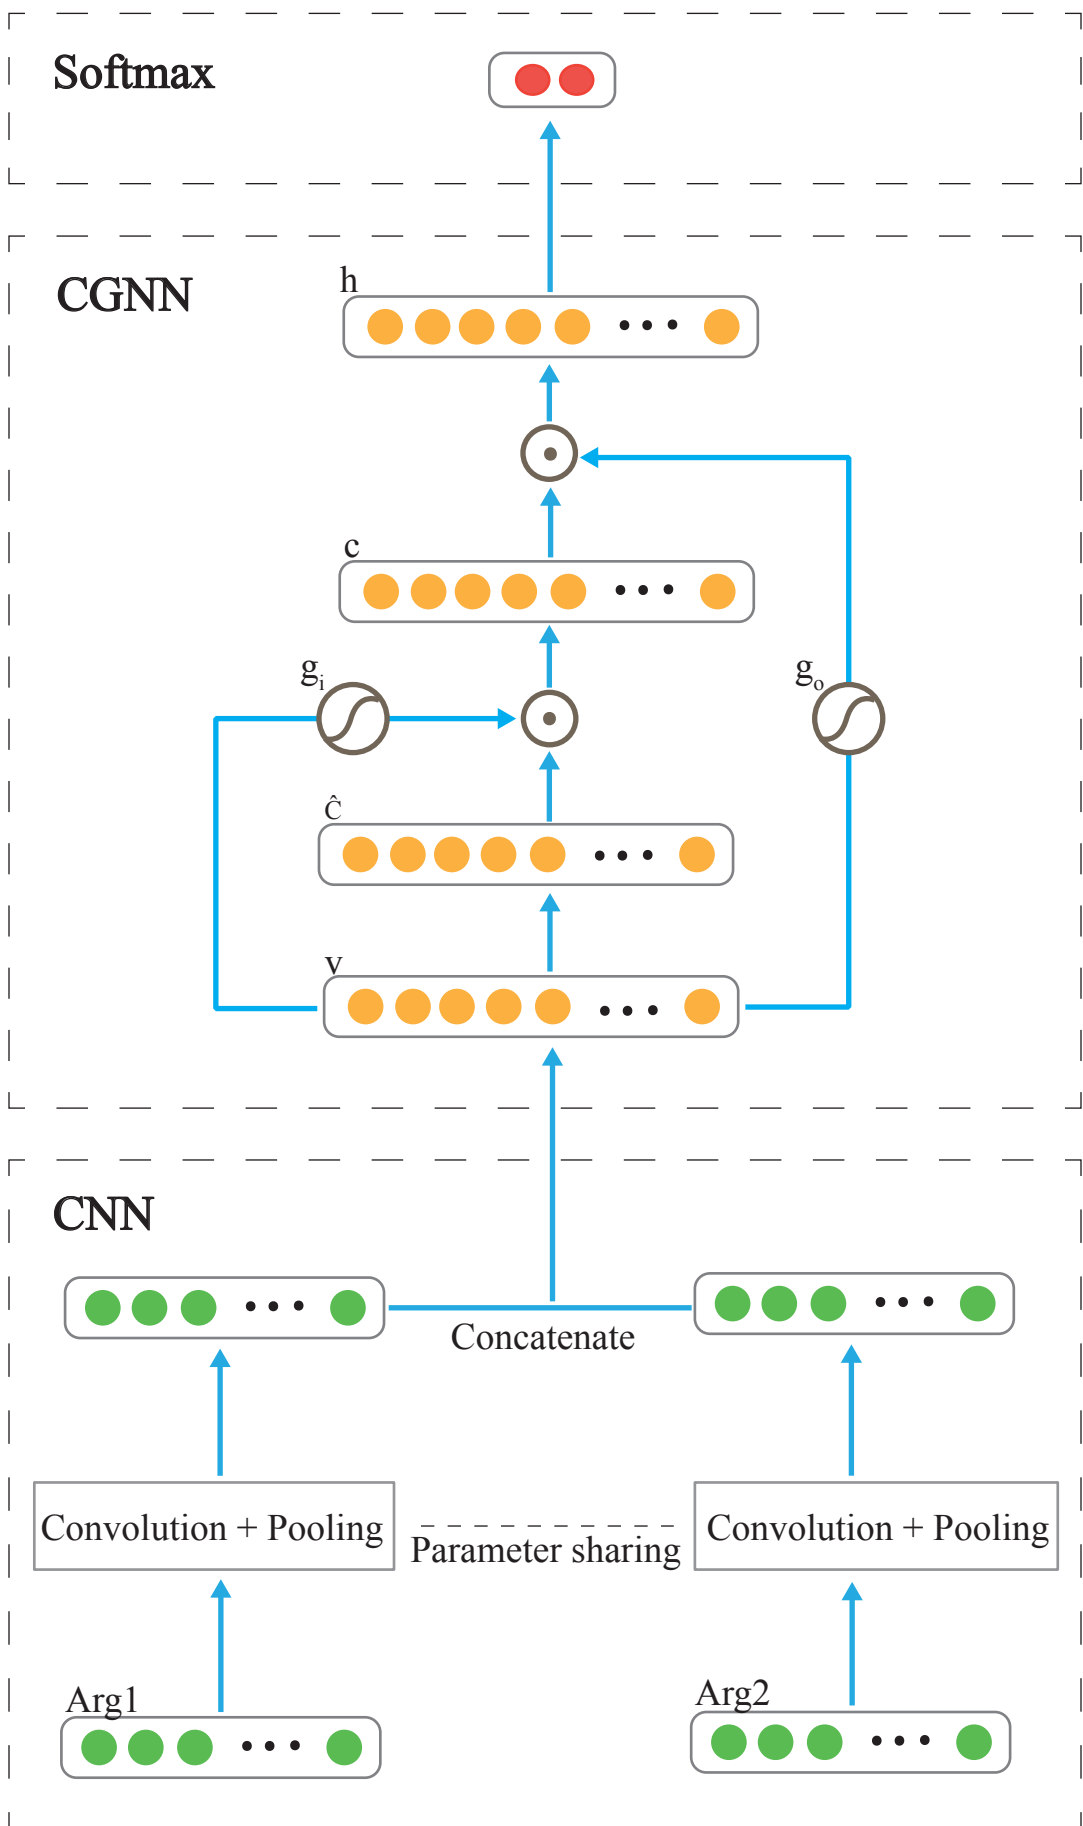

Supplement: Attachment [file D16-1246.Attachment.zip]
